# Supplementary material for: Ethanol thermal reduction synthesis of hierarchical MoO2–C hollow spheres with high rate performance for lithium ion batteries
Source: Royal Society of Chemistry journal article supplement (doi:10.1039/c6ra22792a), 2016-01-01
Supplement: c6ra22792a1.pdf [file c6ra22792a1.pdf]

### Supporting Information

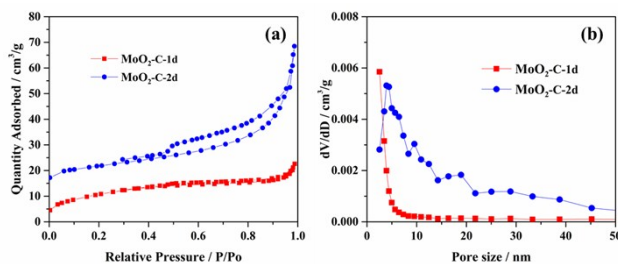

Fig. S1 (a)  $N_2$  adsorption-desorption isotherms and (b) BJH pore size distribution plots for  $MoO_2-C-1d$  and  $MoO_2-C-2d$ .

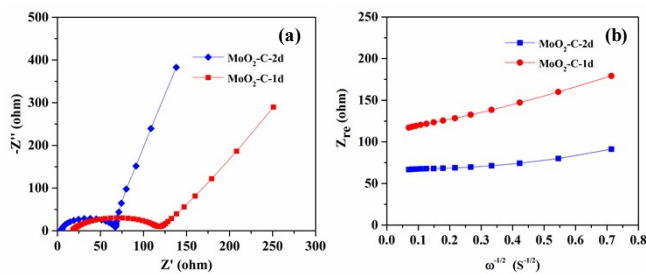

Fig. S2 (a) Nyquist plots and (b) the relationship between  $Z_{re}$  and  $\omega^{-1/2}$  for the  $MoO_2-C-1d$  and  $MoO_2-C-2d$  electrodes after 50 cycles from 1 MHz to 0.05 Hz.
